# Supplementary material for: N6-methyladenosine METTL3-induced circMYO1C accelerates the pancreatic ductal adenocarcinoma tumorigenesis through IGF2BP2/VEGFA manner
Source: Research Square preprint supplement (doi:10.21203/rs.3.rs-1767579/v1), 2022-06-27
Supplement: Supplementary file 1 [file 2171a2456600a65a8269da51.docx]

**supplement Table S1**. Primers sequences for qRT-PCR and sequences of shRNA.

|  | Sequences |
| --- | --- |
| circMYO1C | forward, 5’-CTCAAGTATCTGACCAGGCTCC-3’  reverse, 5’-TTGCCCAAATGAAGGACGCT-3’ |
| IGF2BP2 | forward, 5’- AGCTAAGCGGGCATCAGTTTG-3’  reverse, 5’- CCGCAGCGGGAAATCAATCT-3’ |
| VEGFA | forward, 5’-AGGGCAGAATCATCACGAAGT-3’  reverse, 5’-AGGGTCTCGATTGGATGGCA-3’ |
| sh-circMYO1C-1 | 5’-GGAGGAGGACCTGCTGAGCAT-3’ |
| sh-circMYO1C-2 | 5’- GGGAGGAGGACCTGCTGAGCA-3’ |
| sh-circMYO1C-3 | 5’-CGCCAAGGGGGAGGAGGACCT-3’ |
| circMYO1C probe | 5’-AGCGAATAGACACCTCTCCCACCTGACATC  TGATGAAGACTGTGTCTGCGG-3’ |
| GAPDH | forward, 5’- GGAGCGAGATCCCTCCAAAAT-3’  reverse, 5’- GGCTGTTGTCATACTTCTCATGG-3’ |
